## Research Article

# Shaoyao-Gancao Decoction alleviated hyperandrogenism in a letrozole-induced rat model of polycystic ovary syndrome by inhibition of NF- $\kappa$ B activation

Yun-yun Shao<sup>1,2</sup>, Zhuang-peng Chang<sup>1,2</sup>, Yao Cheng<sup>1,2</sup>, Xin-chun Wang<sup>1,2</sup>, Jing-ping Zhang<sup>1,2</sup>, Xiao-juan Feng<sup>1,2</sup>, Yi-ting Guo<sup>1,2</sup>, Jun-jin Liu<sup>1,2</sup> and Rui-gang Hou<sup>1,2</sup>

<sup>1</sup>Department of Pharmacy, Second Hospital of Shanxi Medical University, Shanxi 030000, China; <sup>2</sup>School of Pharmaceutical, Shanxi Medical University, Shanxi 030000, China

**Correspondence:** Jun-jin Liu (Liujunjin326@163.com) or Rui-gang Hou (Ruiganghou9966@163.com)

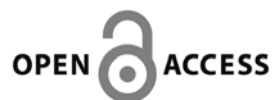

Shaoyao-Gancao Decoction (SGD) has been widely used for the treatment of gynopathy. The present study aimed to evaluate the therapeutic effect and potential mechanism of SGD on hyperandrogenism in polycystic ovary syndrome (PCOS) rats. In the present work, SGD was orally administrated to the PCOS rats at the dose of 12.5, 25, and 50 g/kg/d for 14 consecutive days. UPLC-MS/MS was performed to identify the main chemical components of SGD. Body weight, ovarian weight, cystic dilating follicles, and serum levels of steroid hormones were tested to evaluate the therapeutic effect of SGD. In order to further clarify the underlying mechanism, we also measured mRNA and the protein levels of NF- $\kappa$ B, NF- $\kappa$ B p65, P-NF- $\kappa$ B p65, and I $\kappa$ B by RT-qPCR and Western blotting techniques. Our results showed that SGD treatment significantly alleviated hyperandrogenism in PCOS rats as evidenced by reduced serum levels of T and increased E<sub>2</sub> and FSH levels. In addition, SGD effectively reduced the phosphorylation of NF- $\kappa$ B p65 and increased the expression of I $\kappa$ B. Results of the present study demonstrated that SGD could ameliorate hyperandrogenism in PCOS rats, and the potential mechanism may relate to the NF- $\kappa$ B pathway.

## Introduction

Polycystic ovary syndrome (PCOS), one of the most frequently reported endocrinopathies in women of reproductive age, is characterized by anovulation, hyperandrogenism, and polycystic ovaries syndrome [1,2]. Epidemiologic studies showed that PCOS affected 5–10% reproductive women and it was the leading cause of nearly 75% cases of anovulatory infertility [3]. In addition to the reproductive abnormalities, affected women are more likely to develop various clinical implications, including hyperandrogenism, cardiovascular disease, and endometrial carcinoma. Despite the high prevalence and marked impact of PCOS in the community, the precise mechanism underlying the pathogenesis of PCOS is still not fully understood [4].

At present, accumulating evidence indicate that PCOS is a chronic low-grade inflammation state, which is associated with an increased risk of ovarian dysfunction, metabolic aberration, and cardiovascular disease [5,6]. Patients with PCOS were reported to have elevated levels of inflammatory cytokines, such as TNF- $\alpha$ , IL-1 $\beta$ , IL-6, and IL-18 [7–9]. IL-18 plays an important role in follicular growth and oocyte maturation [10]. IL-6 is associated with hyperandrogenism and insulin resistance in PCOS patients [11]; local inflammation in PCOS ovaries could impair follicular growth and maturation [11]. Inflammation has now been considered as a potential contributor to the pathogenesis of PCOS. This highlights the need

Received: 21 October 2018  
Revised: 29 November 2018  
Accepted: 19 December 2018

Accepted Manuscript Online:  
20 December 2018  
Version of Record published:  
11 January 2019

to understand the pathological mechanism from the perspective of inflammation and search for early medical intervention.

Shaoyao-Gancao Decoction (SGD), also known as Shakuyaku-Kanzo-to in Japan, is a traditional Chinese herbal prescription, which was first recorded in *Treatise on Febrile diseases*, a classical work of traditional Chinese medicine (TCM) written by the famous Chinese physician Zhongjing Zhang in Han Dynasty of Chinese history (202 BC–220 AD) [12]. It is a combination of *Radix Paeoniae Alba* (*Paeonia lactiflora* Pall, root) (PA) and *Glycyrrhizae uralensis* (*Glycyrrhiza uralensis* Fisch., root and rhizome, honeyed) (GU) in the ratio of 1:1. It is traditionally used in the treatment of gynecological disorders, such as dysmenorrhea (*Treatise on Exogenous Febrile Disease*, in 210 CE), PCOS [13], endometriosis, and adenomyosis [14]. Similar herbal prescription has also been used to treat the same diseases in Asia such as Japan. Since 1980s, Japanese researchers have showed that SGD could improve pregnancy rate in oligomenorrheic or amenorrheic women by lowering high serum testosterone levels [15]. Takahashi et al. further conducted a clinical observation study to identify that SGD was effective for achieving pregnancy in patients with PCOS [15,16].

Modern pharmacological studies have showed that SGD possesses multitude of pharmacological activities including analgesia [17] and anti-inflammatory [18] properties. Flavonoids and triterpenoid saponins are reported as the main bioactive compounds of SGD [19,20]. It has been showed that glycyrrhizin and glycyrrhetic acid (triterpenoid saponins) can lower the serum testosterone level *in vitro* and *in vivo* [21–24]. In addition, paeoniflorin, albiflorin, and oxypaeoniflorin are believed to be the main bioactive compounds of PA responsible for anti-inflammation *in vitro* and *in vivo* [25–27]. However, whether the therapeutic effect of SGD on PCOS was achieved by anti-inflammation was still unknown. We all know that rats have regular estrous cycles similar to the women menstrual cycles; thus, rats are suitable for PCOS modeling. Based on the above facts, in the present work we investigated the therapeutic effect of SGD on hyperandrogenism in letrozole-induced PCOS rat model and further elucidated the underlying molecular mechanisms.

## Methods

### Chemicals and reagents

Letrozole, 2.5 mg/piece, was purchased from HengRui Pharmaceutical Factory (Jiangsu, China). ELISA kits for T, E<sub>2</sub>, LH, FSH, and P assays were purchased from Sinobestbio (Shanghai, China). *Radix Paeoniae Alba* (Anhui, China) and *Glycyrrhizae uralensis* (Shanxi, China) were purchased from China National Pharmaceutical Group Co., Ltd (Taiyuan, Shanxi, China). The plants were identified by J.-p.Z. (Department of Pharmacy, Second Hospital of Shanxi Medical University).

### Preparation and quantity control of SGD

SGD, which is composed of PA and GU, was prepared according to original Chinese documents. Briefly, PA and GU were mixed together and macerated in deionized water (1:10, w/v) for 1 h. Then SGD was obtained by boiling in water for 1 h each time and repeated for two times. The solution obtained was filtered and concentrated to 4.24 g crude material per ml.

An ABI 5500 QTRAP mass spectrometer was operated in the present work. The chromatography analysis was carried out on a reverse phase XB-C18 (2.6 μm, 100 mm × 2.1 mm, hypersil) column. The mobile phase consisted of 0.1% formic acid in water (A) and methanol (B). The gradient program was as follows: 70% B at 0–5.5 min, 70–15% B at 5.5–6.5 min, 15–10% B at 6.5–7 min, 10% B at 7.5–9.5 min, 10–70% B at 9.5–11 min, 70% B at 11–12 min, flowing at 0.3 ml/min. The injection volume for sample analysis was 5 μl.

### Animals and induction of PCOS model

A total of 48 female adult rats were obtained from the Laboratory Animal Center of Chinese Food and Drug Administrator. All rats were allowed to adapt for the environment for 1 week. The breeding room was maintained at constant temperature on a 12–12 h alternating light–dark cycle. All animals had free access to water and food. The Ethics Committee of animal care and use of the Second Hospital of Shanxi Medical University (2015KS001) approved the proposals. The rat model of PCOS was developed by orally administrating with letrozole (Jiangsu HengRui Pharmaceutical Factory, China) at the dose of 1 mg/kg as previously reported. The control group was orally administrated with saline instead of letrozole. To study whether letrozole treatment altered the estrous cycle, vaginal smears were performed every other day by vaginal washing, and then evaluated by microscopy during the treatment period; only the rats with altered estrous cycle were selected for the PCOS rats.

## Experimental design

The experiment was aimed to evaluate the effect of SGD on hyperandrogenism in letrozole-induced PCOS rats. A total of 48 rats were randomly assigned 6 groups ( $n=8$  per group): control group, PCOS group, PCOS + SGD (12.5 g/kg) group, PCOS + SGD (25 g/kg), PCOS + SGD (50 g/kg), and PCOS + Diane-35 group. After 2 weeks of drug treatment, the rats were killed for sample collection. The whole blood samples were collected and centrifuged at 3000 rpm for 10 min; both ovaries of all rats were removed; one was collected for histological examination and the other was stored at  $-80^{\circ}\text{C}$  until further analysis. At the end of the study, the animals were deeply anesthetized with chloral hydrate (350 mg/kg, i.p.) and killed by cervical dislocation.

## Vaginal smears for estrus phase determination

Vaginal smears were carried out every other day on all rats accordingly [28]. Briefly, a sterile cotton swab was inserted into the rat vagina to collect the vaginal secretions. The vaginal secretions were fixed in absolute ethanol and then stained with hematoxylin–eosin (H&E) dye. The estrus phase was evaluated by microscopy with Giemsa staining.

## Ovarian histopathology and immunohistochemical (IHC) staining

Ovary tissue from all rats was harvested after killing. After weighing with a precision balance (Sarto-rius, BT 125D, Germany), the ovaries were fixed with 4% formaldehyde buffer, embedded in paraffin, sectioned into 4  $\mu\text{m}$  slides, and stained with H&E, dehydrated in 95%, 90%, and 70% ethanol, cleared in xylene. The sections were observed using a microscope (Carl Zeiss Microscopy GmbH, Goettingen, Germany).

Paraffin-embedded ovary tissues were cut into 5  $\mu\text{m}$  sections. The sections were deparaffinized, rehydrated, and placed in citrate buffer (pH 6.0) for retrieving the antigens. After that, the sections were quenched in 3%  $\text{H}_2\text{O}_2$  for 15 min and blocked with 5% BSA. Primary antibody for IL-1 $\beta$ , TNF- $\alpha$ , IL-6, and IL-18 (Biosynthesis) was incubated overnight at  $4^{\circ}\text{C}$  in the ratio of 1:2000, respectively. After washing with PBS, the sections were incubated with HRP labeling antibodies for 1 h. DAB solution was applied for the visualization of the reaction product.

## Western blot analysis

The ovary tissues were homogenized in the lysis buffer and centrifuged at 10,000 g at  $4^{\circ}\text{C}$  for 10 min. The protein concentration in the supernatants was measured by bicinchoninic acid protein assay reagent. The samples were separated on 10% SDS-PAGE and transferred to polyvinylidene fluoride membrane. Non-specific binding sites were incubated with non-fat milk, and then the membrane was incubated overnight at  $4^{\circ}\text{C}$  with corresponding primary antibodies. The membranes were washed in  $1 \times$  TBST, and then incubated with the appropriate HRP conjugated secondary antibodies. The immunoreaction was detected using the electrochemiluminescence Western blotting detection kit. The scanned digital images were quantified using NIH Image J software.

## Real-time reverse transcriptase quantitative polymerase chain reaction

RT-qPCR was conducted according to a previously described method [29]. Total RNA was extracted from ovary using RNA prep Pure Tissue Kit (Tiangen Biotech, China) according to the manufacturer's instructions and cDNA was transcribed from the total RNA. The primer sequences of TNF- $\alpha$ , IL-1 $\beta$ , IL-6, IL-18, estrogen receptor  $\alpha$  (ER $\alpha$ ), steroid sulfatase (STS), estrogen sulfotransferase (EST), NF- $\kappa\text{B}$ , NF- $\kappa\text{B}$  p65, I $\kappa\text{B}$ , and  $\beta$ -actin were listed in Table 1. RT-qPCR was carried out as follows: single cycle at  $95^{\circ}\text{C}$  for 15 min; 40 cycles of denaturation at  $95^{\circ}\text{C}$  for 15 s, followed by annealing and elongation at  $61^{\circ}\text{C}$  for 31 s. Results were analyzed using  $2^{-(\Delta\Delta C_T)}$  method and mRNA levels were represented as fold changes of  $\beta$ -actin.

## ELISA analysis for hormone and inflammatory cytokine levels

Rat serum samples and ovary tissues were collected as previously described. Serum hormone levels (T,  $\text{E}_2$ , LH, FSH, and P) and inflammatory cytokines (TNF- $\alpha$ , IL-1 $\beta$ , IL-6, and IL-18) were assayed using ELISA kits (Expandbio, Beijing, China). ELISA procedures were conducted as manufacturer's instructions.

## Statistical analysis

All data were expressed as mean  $\pm$  SEM. Multiple means were compared with two-way ANOVA. Differences between two groups were analyzed by Student's *t*-test and a value of  $P < 0.05$  was considered statistically significant.

**Table 1** List of primers for real-time PCR

| Gene name          | Forward primer (5'-3')     | Reverse primer (5'-3')    |
|--------------------|----------------------------|---------------------------|
| TNF- $\alpha$      | AGCACGGAAGCATGATCCG        | ACCGATCACCCCGAAGTTCA      |
| IL-1 $\beta$       | CCCTTGTCGAGAATGGGCAG       | GACCAGAATGTGCCACGGTT      |
| IL-6               | CCCCAACTCCAATGCTCTCC       | AGCACACTAGGTTTGCCGAG      |
| IL-18              | CAGCCAACGAATCCCAGACC       | AGATAGGGTCCACAGCCAGTCC    |
| ER $\alpha$        | TCTGGAGTGTGCCTGGTTGGAG     | GCGGAATCGACTTGACGTAGCC    |
| STS                | ATGGCTGATGACCTTGGCATTGG    | CGCCAGGTGCTGAGTCAACTTC    |
| EST                | ACCTGCCAGCTAAGCTCCTCC      | CCAGGAACCATACGGAACCTGCC   |
| NF- $\kappa$ B     | TGTGGTGGAGGACTTGCTGAGG     | AGTGTGCCTTGCTGTTCTTGAG    |
| NF- $\kappa$ B p65 | GATGGCTTCTATGAGGCTGAACCTCG | CTTGCTCCAGGTCTCGCTTCTTC   |
| I $\kappa$ B       | GAAGGACGAGGATTACGAGCAGATG  | ATGGTCACTGCTTCTCTCATGGATG |
| $\beta$ -Actin     | AGATTACTGCCCTGGCTCCT       | ACATCTGCTGGAAGGTGGAC      |

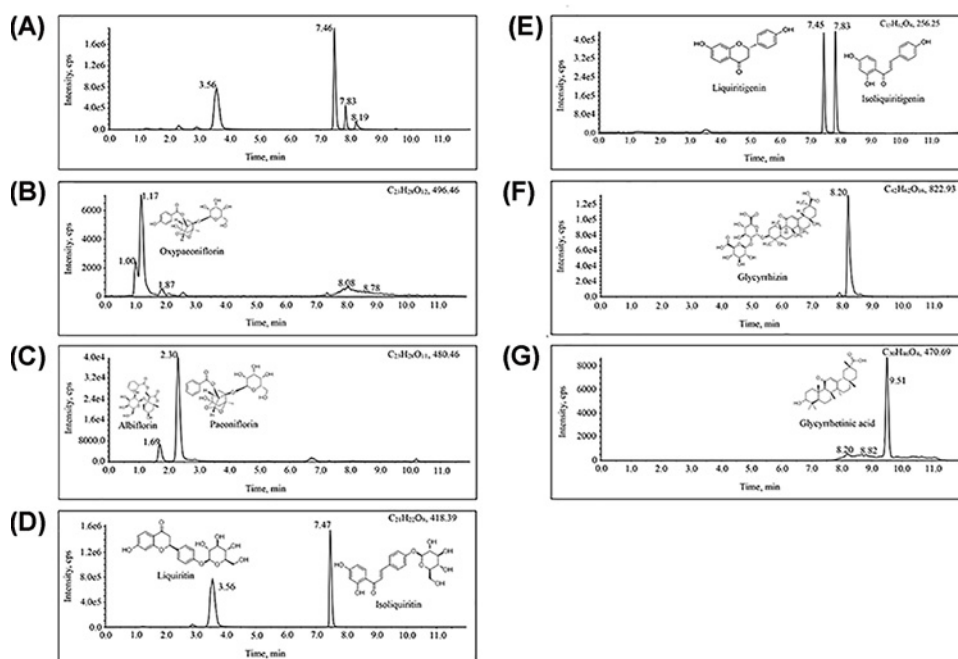

**Figure 1.** UPLC-MS/MS profiles of the analytes in SGD

(A) Total ion chromatograms, (B) oxypaeoniflorin, (C) albiflorin and paeoniflorin, (D) liquiritin and isoliquiritin, (E) liquiritigenin and isoliquiritigenin, (F) glycyrrhizin, and (G) glycyrrhetic acid.

## Results

### UPLC-MS/MS analysis of eight components in SGD

For the ionization of compounds in SGD, negative ion polarity modes were used in high and low collision energy test. Oxypaeoniflorin, albiflorin, paeoniflorin, liquiritin, isoliquiritin, glycyrrhizin, and glycyrrhetic acid were eluted at 1.17, 1.69, 2.28, 3.56, 7.47, 8.19, and 9.51 min, respectively (Figure 1). Liquiritigenin and isoliquiritigenin, a pair of isomers, had identical product ion at MS/MS transitions ( $m/z$ ) 255. The optimized MS/MS energy parameters declustering potential and collision energy of the analytes were shown in Table 2.

### Effect of SGD on the body weight and ovarian weight of PCOS rats

Given that obesity is the most common clinical feature of PCOS, we investigated whether SGD treatment could influence the body weight and ovarian weight in PCOS rats. As shown in Figure 2A, body weight in PCOS rats was significantly elevated when compared with the normal rats ( $P < 0.05$ ), indicating that the PCOS rats had gained more weight, indicating the feature of PCOS. However, Figure 2A and B showed that compared with the PCOS rats, body

**Table 2 MS/MS transitions and parameters for the detection of the analytes**

| Analyte                          | Precursor ion (m/z) | Product ion (m/z) | CE (V) | DP (V) |
|----------------------------------|---------------------|-------------------|--------|--------|
| Paeoniflorin                     | 479.1               | 121.0             | -20.2  | -120.0 |
| Albiflorin                       | 479.1               | 121.1             | -80.0  | -46.0  |
| Oxypaeoniflorin                  | 495.1               | 137.1             | -150.0 | -32.8  |
| Liquiritin/Isoliquiritin         | 417.3               | 255.1             | -130.0 | -26.2  |
| Liquiritigenin/Isoliquiritigenin | 255.1               | 119.0             | -80.0  | -35.0  |
| Glycyrrhetic acid                | 469.3               | 355.2             | -122.0 | -63.0  |
| Glycyrrhizin                     | 821.4               | 350.9             | -80.0  | -58.8  |

weight and ovarian weight in SGD-treated rats were significantly and dose-dependently reduced ( $P < 0.05$ ), suggesting that SGD could alleviate the symptoms of obesity.

### Effect of SGD on estrous cycles of PCOS rats

Since the regular estrous cycle is a main index of the normal ovarian function in humans, to evaluate the effect of SGD on estrous cycle in rats, we verified the stage of estrous cycle by vaginal smear. Among 40 letrozole-induced rats, 85% rats had irregular estrous cycles, namely only 34 rats were selected as PCOS rats. Figure 2 showed that after low-dose SGD treatment, 71.4% PCOS rats had regular estrous cycle. In addition, the population of rats with estrous stages could show recovery up to 85.7% in the middle-dose and high-dose SGD groups. These findings suggested that SGD could regulate the estrous cycles of PCOS rats.

### Effect of SGD on ovarian morphological changes of PCOS rats

As the morphological changes of ovary were the major feature of patients with PCOS, we investigated whether SGD changed the appearance and histological structures of ovaries. As shown in Figure 2D, compared with the normal rats, the ovaries in PCOS group showed increased cystic dilating follicles, reduced layers of granular cells (GCs), and disappeared oocytes and corona radiating in the follicles. Compared with the PCOS group, SGD treatment dose-dependently decreased the number of cystic dilating follicles and increased the layers of GCs.

### Effect of SGD on steroid hormone levels in PCOS rats

In addition to suppress the increased body weight and ovarian weight of PCOS rats, we further investigated whether SGD could regulate the steroid hormone levels of PCOS rats. As shown in Figure 3, compared with the normal rats, the levels of T and LH in the serum of PCOS rats were all significantly increased ( $P < 0.05$ ), whereas the levels of estrogen and FSH were significantly decreased ( $P < 0.05$ ), which was in accordance with the characteristic hormone changes in patients with PCOS. Treatment with SGD reversed the increased serum levels of androgen in PCOS rats and the decreased serum levels of estrogen. Moreover, serum levels of progesterone were dose-dependently increased in SGD treatment group, but there was not a significant difference ( $P > 0.05$ ).

### Effect of SGD on TNF- $\alpha$ , IL-1 $\beta$ , IL-6, and IL-18 levels of PCOS rats

Low-grade chronic inflammation in PCOS could be considered one of the potential links between PCOS and ovarian dysfunction, metabolic aberration, and cardiovascular disease. SGD possesses the pharmacological activities of anti-inflammatory. Thus, we investigated whether administering SGD could regulate the level of pro-inflammatory cytokines. As shown in Figures 4–6, compared with control group, TNF- $\alpha$ , IL-1 $\beta$ , IL-6, and IL-18 levels in serum and ovary tissue were increased in PCOS group. On the contrary, treatment with SGD markedly decreased the levels of TNF- $\alpha$ , IL-1 $\beta$ , IL-6, and IL-18 in serum and ovary tissue ( $P < 0.05$ ).

### Effect of SGD on NF- $\kappa$ B, NF- $\kappa$ B p65, P-NF- $\kappa$ B p65, and I $\kappa$ B levels in PCOS rats

All our studies so far showed that SGD has therapeutic effect on hyperandrogenism in PCOS rats. In addition, SGD marked decrease in the pro-inflammatory cytokine levels of TNF- $\alpha$ , IL-1 $\beta$ , IL-6, and IL-18. It was well known that NF- $\kappa$ B is a transcription factor that plays a crucial role in controlling the inflammatory process. Therefore, we further investigated whether the anti-inflammation effect of SGD was mediated by inhibiting the phosphorylation of NF- $\kappa$ B. As shown in Figures 6,7, the ovarian mRNA levels of NF- $\kappa$ B and NF- $\kappa$ B p65 were significantly increased ( $P < 0.01$ ) in the PCOS group. However, the increased mRNA levels were decreased significantly in the SGD intervention groups.

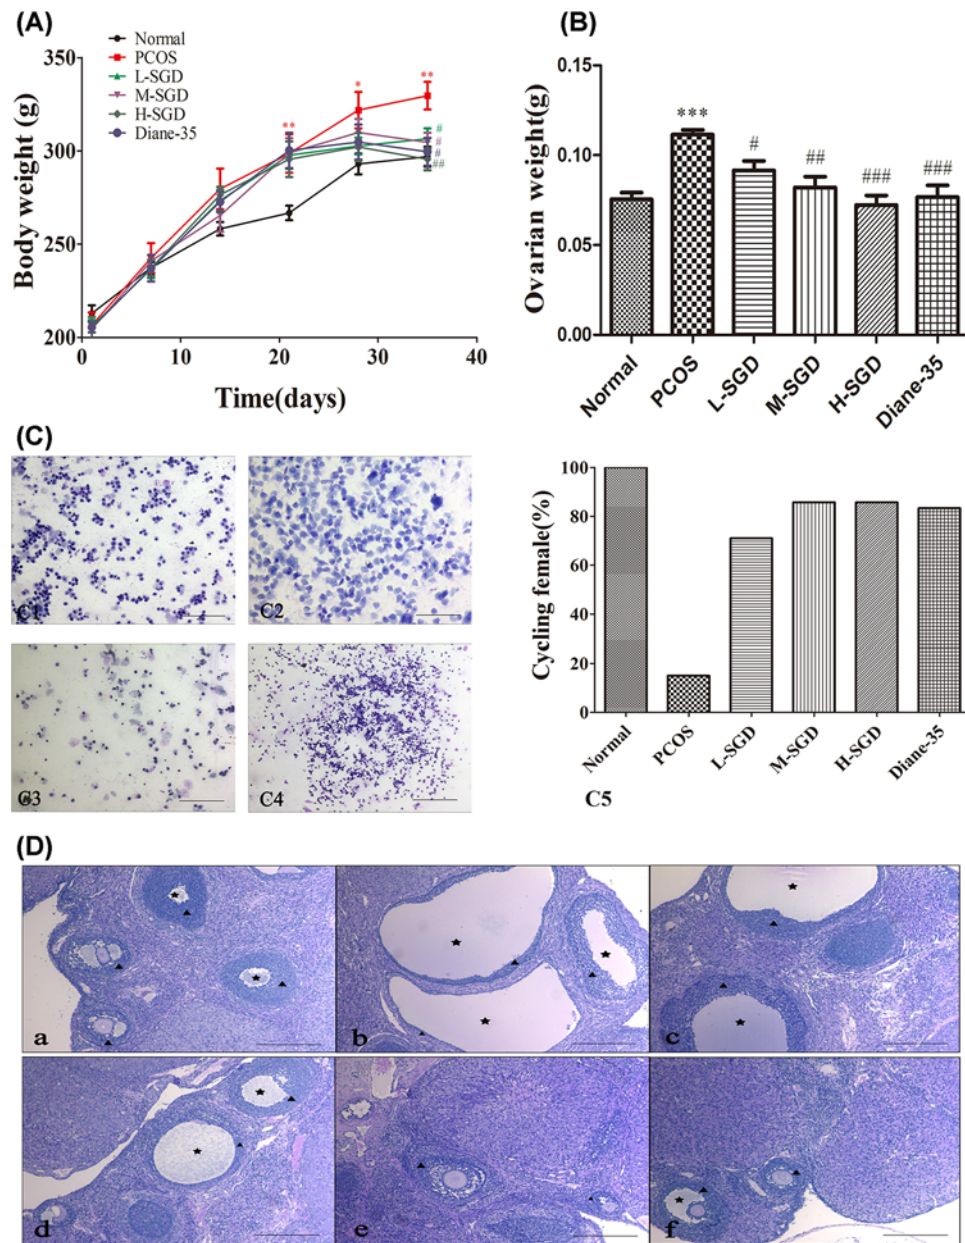

**Figure 2. The therapeutic effect of SGD on PCOS rats**

(A and B) Effects of SGD on body weight and ovarian weight in PCOS rats. (C) Effect of SGD in estrous cycle in PCOS rats; (C1–C4) representative photomicrographs of the vaginal smears stained for H&E dye staining proestrus (C1), estrous (C2), metestrus (C3), and diestrus stages (C4); (C5) statistical graphs of estrous cycle in the normal group and PCOS group. (D) Effects of SGD on morphological changes in ovarian tissues of PCOS rats, (a) normal group; (b) PCOS group; (c) L-SGD group; (d) M-SGD group; (e) H-SGD group; (f) Diane-35 group. ★ indicated the appearances of cystic follicle, ▲ indicated the appearances of granular cells layer; (magnification,  $\times 100$ ), scale bars, 200  $\mu\text{m}$ . Data are presented as mean  $\pm$  SEM ( $n=8$ ). \* $P<0.05$  compared with normal group, \*\* $P<0.01$  compared with normal group, \*\*\* $P<0.001$  compared with normal group, # $P<0.05$  compared with PCOS rats, ## $P<0.01$  compared with PCOS rats, and ### $P<0.001$  compared with PCOS rats.

In addition, the mRNA and protein levels of I $\kappa$ B were decreased in the ovary tissue of PCOS rats and SGD treatment notably reversed the changes. It is worth noting that the ratio of P-NF- $\kappa$ B p65/NF- $\kappa$ B p65 was increased in the PCOS group and SGD treatment could significantly reduce the ratio, suggesting that the inflammation was triggered in PCOS group and SGD had the ability of inhibiting the phosphorylation of NF- $\kappa$ B p65.

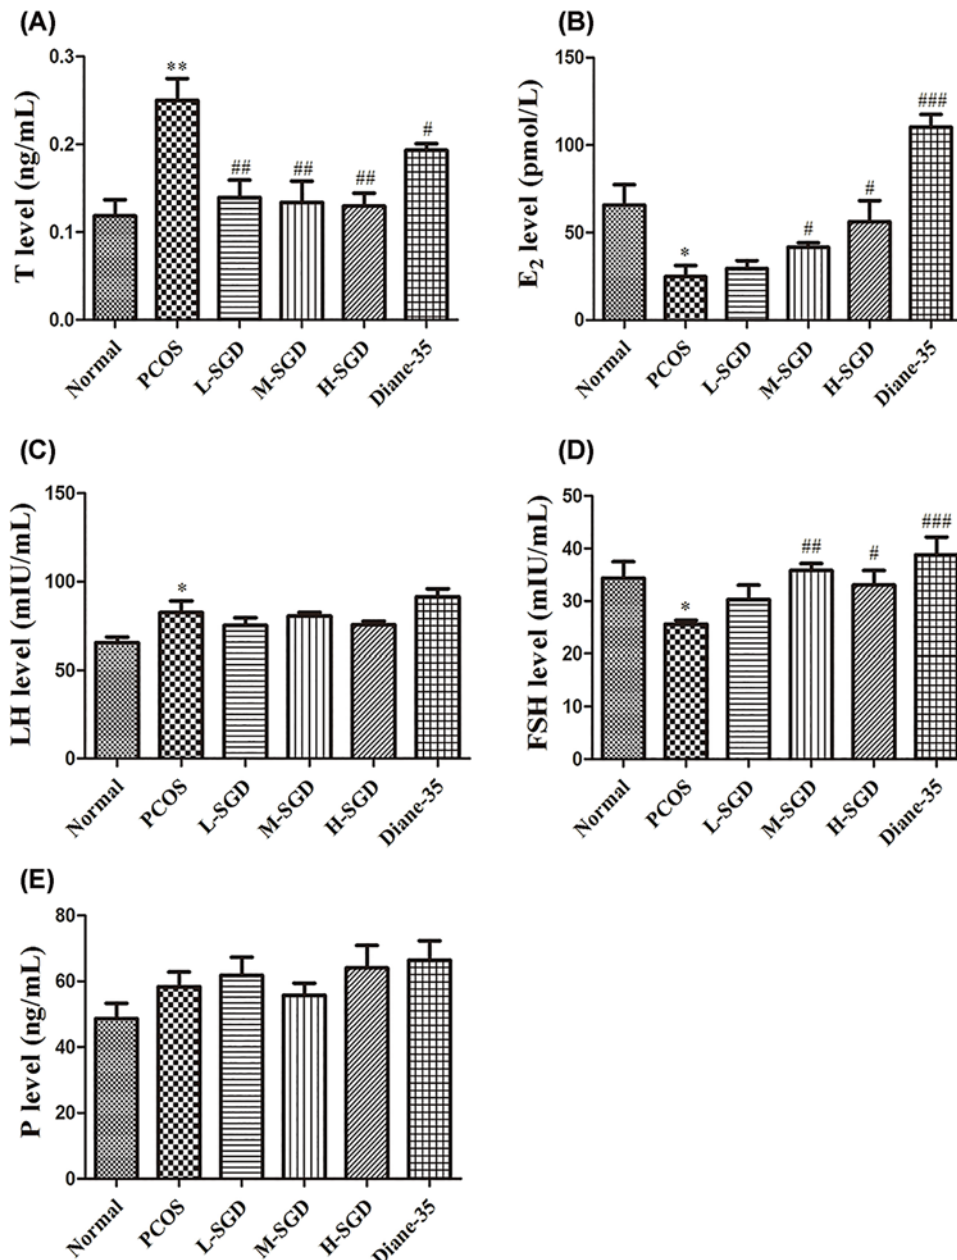

**Figure 3.** Effects of SGD on the serum levels of hormones in PCOS rats detected by ELISA kit

(A–E) represented testosterone (T), 17 $\beta$ -estradiol (E<sub>2</sub>), luteinizing hormone (LH), follicle stimulating hormone (FSH), and progesterone (P), respectively. Data are presented as mean  $\pm$  SEM ( $n=8$ ). \* $P<0.05$  versus normal group, \*\* $P<0.01$  versus normal group, # $P<0.05$  versus PCOS rats, ## $P<0.01$  versus PCOS rats, and ### $P<0.001$  versus PCOS rats.

## Discussion

For a long time, the treatment of PCOS relies on application of clomiphene citrate [30]. However, besides the side effect of clomiphene citrate, some patients were non-responsive for clomiphene citrate [31]. Recently, new treatment based on traditional Chinese herbs provided a novel therapeutic way for PCOS. The present study demonstrated that SGD could ameliorate hyperandrogenism in PCOS rats, and the potential mechanism may involve NF- $\kappa$ B pathway.

Steroid hormones such as T, E<sub>2</sub>, LH, FSH, and P play key roles in fertility and reproductive function through activating the specific nuclear receptors. For example, abnormal production of LH affects the function of the granulosa and theca interna layers [32]. E<sub>2</sub> influences growth and differentiation of GCs [33]. T plays an important role in

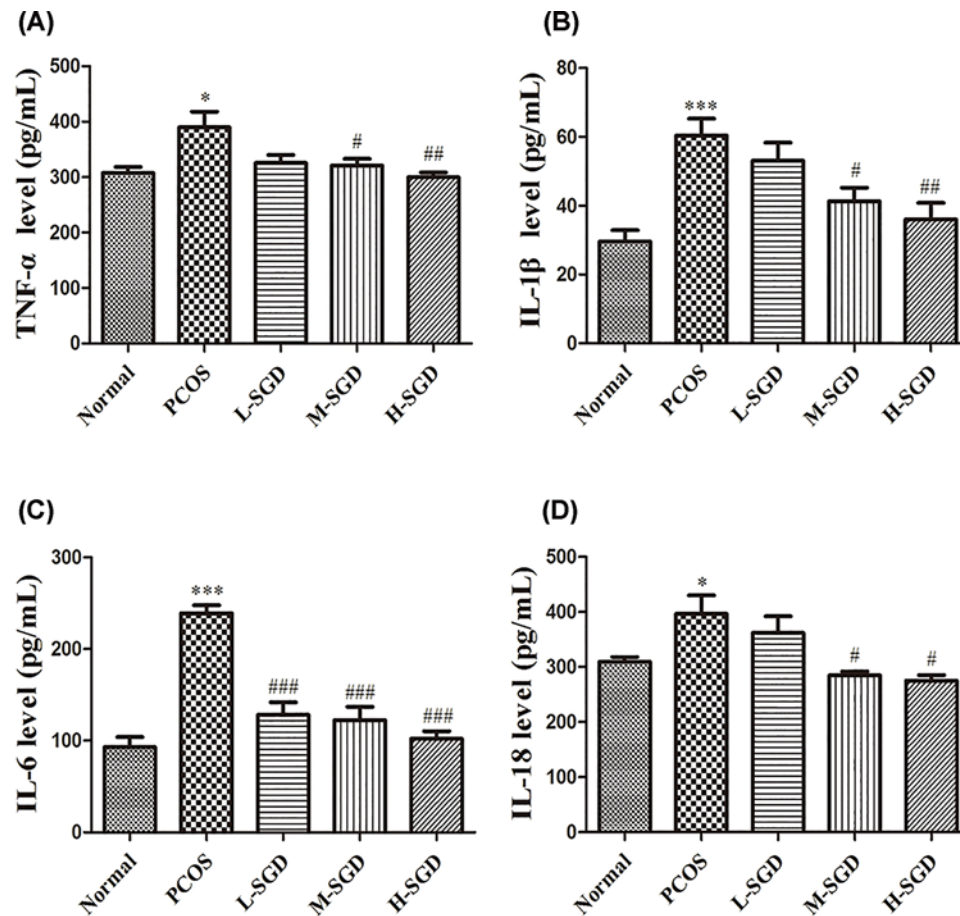

**Figure 4. Effects of SGD on the serum levels of inflammatory factors in PCOS rats**

The concentrations of (A) TNF- $\alpha$ , (B) IL-1 $\beta$ , (C) IL-6, and (D) IL-18 were measured with ELISA kit. Data are presented as mean  $\pm$  SEM ( $n=8$ ). \* $P<0.05$  compared with normal group, \*\*\* $P<0.001$  compared with normal group, # $P<0.05$  versus PCOS rats, ## $P<0.01$  compared with PCOS rats, and ### $P<0.001$  versus PCOS rats.

physiological process of ovarian follicular maturation [34]. Our results showed that the levels of T and LH in the serum of PCOS rats were significantly increased, whereas the levels of E<sub>2</sub> and FSH were significantly decreased. These hormonal profiles are consistent with the hormonal environment described in PCOS patients [35,36]. Moreover, we also showed that SGD treatment dose-dependently and significantly reversed the alteration in serum levels of hormone, i.e., SGD can reduce the serum levels of T and LH and increase the serum levels of E<sub>2</sub> and FSH in PCOS rats. As E<sub>2</sub> level was from the conversion of T, the increased E<sub>2</sub> level was in accordance with the reduced levels of T. These results suggested that, to a certain extent, SGD could rebalance the serum levels of T and E<sub>2</sub>. It was reported that the disorder of steroid hormones could be caused by disturbance of the hypothalamus–pituitary–gonadal axis [37]. Alterations in key synthesis or catalysis enzyme activities of hormones also can lead to hormonal environment imbalance in PCOS patients [38]. In addition, abnormal expression level of nuclear receptors, including androgen receptor and ER $\alpha$ , involved in disorder of hormonal environment [39,40]. The results showed that the treatment with SGD could increase the mRNA levels of ER $\alpha$  and EST, and decreased the STS levels (Supplementary Figure S1). As we know, TCM exerts therapeutic effects through multi-target and multi-pathway, the regulation of SGD on hormones disorder may be through hypothalamus–pituitary–gonadal axis or the enzymatic activity of ovarian P450arom and P450c17a or expression level of nuclear receptors. More studies are needed to explore these questions.

The hallmarks of women with PCOS are the presence of polycystic ovaries and hyperandrogenism. It is reported that peroxisome proliferator-activated receptor- $\gamma$  (PPAR- $\gamma$ ) can affect adipocyte differentiation, glucose and lipid homeostasis, [41] and hyperandrogenism that could down-regulate the expression of PPAR- $\gamma$  [42]. Thus, it is speculated that obesity in women with PCOS could be partially attributed to hyperandrogenism. Results from the present study showed that body and ovarian weights were markedly increased in letrozole-induced PCOS rats, which are



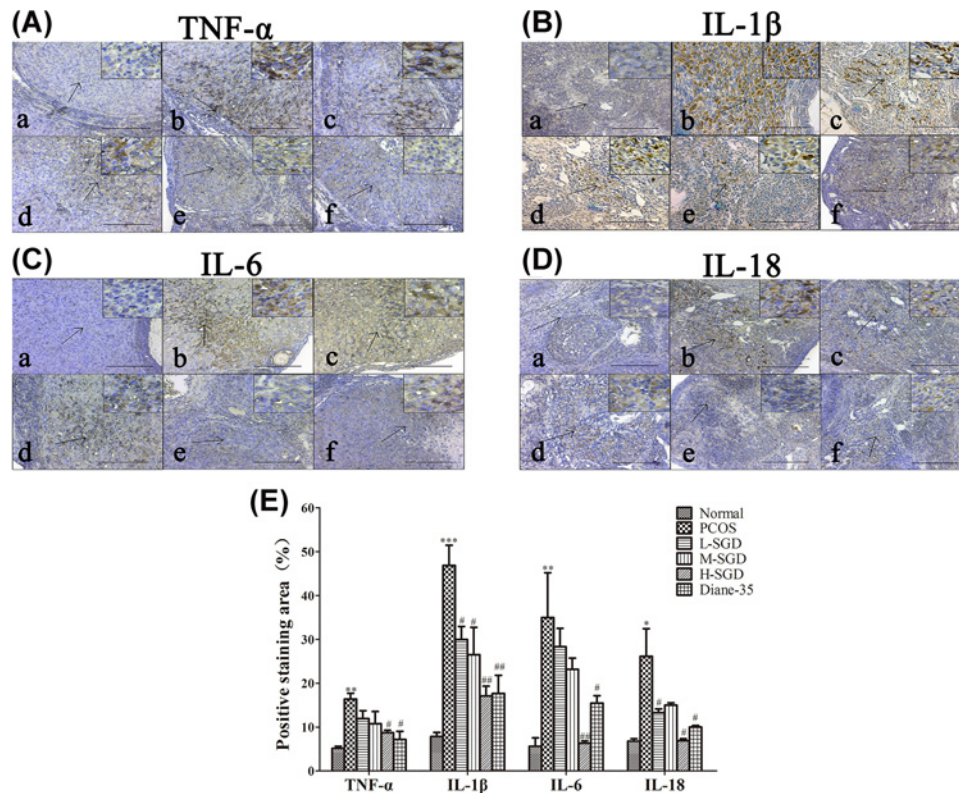

**Figure 5. Effects of SGD on the expression of inflammatory factors in the ovarian tissues in PCOS rats determined by IHC staining**

(A–D) show representative images of immune infiltration areas of TNF- $\alpha$ , IL-1 $\beta$ , IL-6, and IL-18 (marked with arrows in each marker), respectively. Scale bars indicate 100  $\mu$ m (200 $\times$ ) in large pictures and 50  $\mu$ m (400 $\times$ ) in small-corned pictures. (E) shows quantitative analysis for TNF- $\alpha$ , IL-1 $\beta$ , IL-6, and IL-18 expression. Data are presented as mean  $\pm$  SEM ( $n=8$ ). \* $P<0.05$  compared with normal group, \*\* $P<0.01$  compared with normal group, \*\*\* $P<0.001$  compared with normal group, # $P<0.05$  compared with PCOS rats, and## $P<0.01$  compared with PCOS rats.

consistent with previous findings [43]; we also found that SGD treatment dose-dependently reduced body weight and ovarian weight in PCOS rats, and the reduced body weight and ovarian weight correlate significantly with the alterations of circulation level of T. These results indicated that the active ingredients of this formulation might exert losing weight effects through reducing circulation level of T.

As a typical clinical feature of PCOS, hyperandrogenism could obviously affect the physiological process of ovarian follicular maturation [44]. However, the underlying mechanism has not been clarified. It was found that GCs play a crucial role in promoting preantral follicle growth and prevent follicular atresia, and T could affect GCs differentiation [45]. Evidence also showed that T could cause early luteinization of ovarian granular layer cells, resulting in excessively small follicles [46]. Therefore, hyperandrogenism was believed to play prominent roles in the symptom generation of polycystic ovaries. Our results showed increased number of cystic dilation follicles and fewer layers of GCs in PCOS rats. We also found that SGD treatment dose-dependently decreases the size and number of follicular cysts, and increases the layers of GCs in PCOS rats. Given the vital role of T in the symptom generation of PCOS, it is possible that the decreased T level in SGD-treated rats be responsible for the follicular growth and oocyte maturation of PCOS rats.

To date, the mechanism concerning hyperandrogenism in PCOS is still not clear, but it is reported to be correlated with the increased synthesis of T precursors and excess T secretion from ovary [34]. NF- $\kappa$ B has been regarded as the key mediator of the inflammatory process and regulated a number of genes, including TNF- $\alpha$ , IL-1 $\beta$ , IL-6, and IL-18 [6]. Under normal condition, NF- $\kappa$ B can form an inactive complex with I $\kappa$ B in the cytoplasm. Upon stimulation, NF- $\kappa$ B translocates to the nucleus where it can activate certain genes by binding to promoter regions [47,48]. The activation of NF- $\kappa$ B involves the phosphorylation of the I $\kappa$ B protein on two conserved serine residues, which is carried out by I $\kappa$ B kinase complex. After I $\kappa$ B phosphorylation and subsequent proteolysis, NF- $\kappa$ B transcription factor

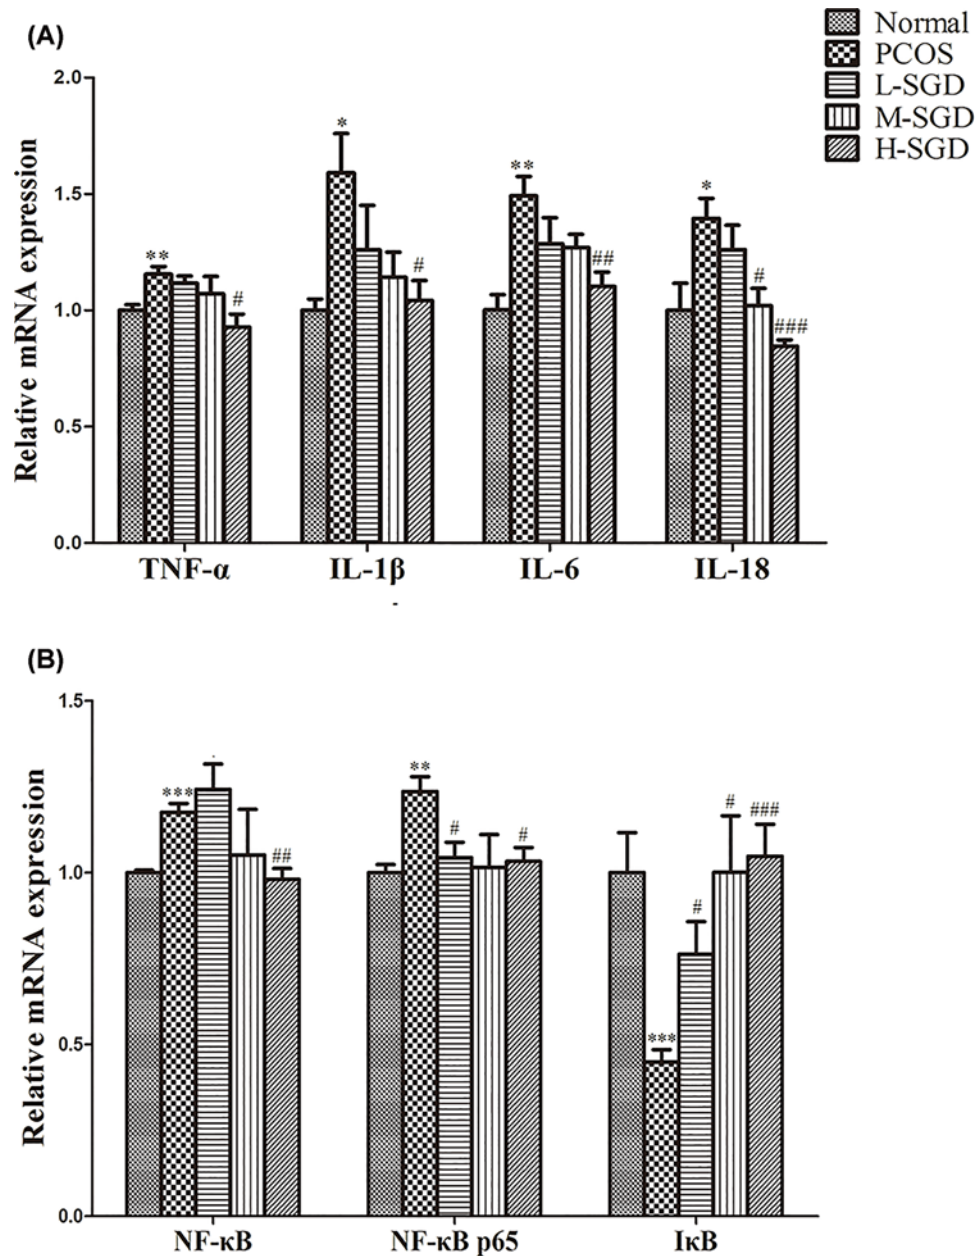

**Figure 6.** Effects of SGD on NF- $\kappa$ B signaling pathway relative gene mRNA levels in PCOS rats.

The mRNA levels of (A) inflammatory factors (TNF- $\alpha$ , IL-1 $\beta$ , IL-6, and IL-18) and (B) NF- $\kappa$ B signaling pathway relative genes (NF- $\kappa$ B, NF- $\kappa$ B p65, and I $\kappa$ B) were determined by real-time PCR. The expression levels of target mRNA were standardized by  $\beta$ -actin mRNA level in each sample. Data are presented as mean  $\pm$  SEM ( $n=8$ ). \* $P<0.05$  compared with normal group, \*\* $P<0.01$  compared with normal group, \*\*\* $P<0.001$  versus normal group, # $P<0.05$  compared with PCOS rats, ## $P<0.01$  compared with PCOS rats, and ### $P<0.001$  compared with PCOS rats.

p50/p65 is translocated to the nucleus, activating transcription of its target genes [49,50]. We found that the phosphorylation of NF- $\kappa$ B was significantly increased in PCOS rats. By contrast, SGD treatment obviously suppressed the phosphorylation of NF- $\kappa$ B. Paeoniflorin, albiflorin, and oxypaeoniflorin are the main ingredients of Radix Paeoniae Alba, which are responsible for anti-inflammation in the prescription of SGT. It is reported that these compositions could inhibit the phosphorylation of I $\kappa$ B and block NF- $\kappa$ B transcription factor p50/p65 activation [51]. In addition, paeoniflorin could affect DNA binding ability of nuclear translocation p65 [51,52]. Thus, we speculated that SGD affects NF- $\kappa$ B activation by inhibiting I $\kappa$ B phosphorylation and blocks DNA binding ability of NF- $\kappa$ B transcription

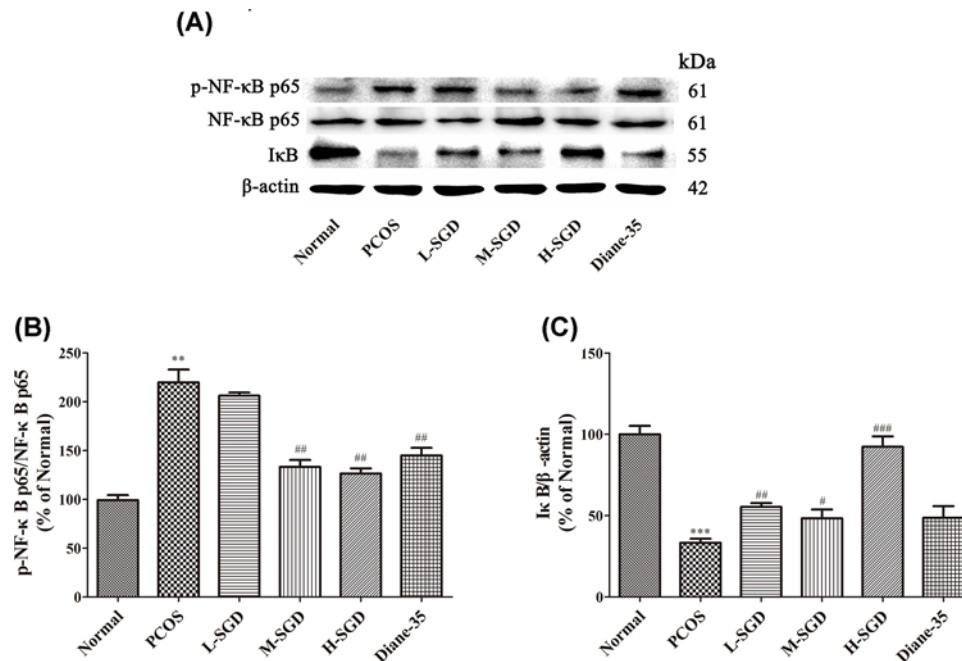

**Figure 7. Effects of SGD on NF-κB p65, p-NF-κB p65, and IκB protein expression in PCOS rats**

(A) Western blot analysis shows the relative expression of NF-κB p65, p-NF-κB p65, and IκB. (B–C) Quantitative analysis of NF-κB p65, p-NF-κB p65, and IκB. Data are presented as mean ± SEM of three identical experiments. \*\*\* $P < 0.001$  compared with normal group, # $P < 0.05$  compared with PCOS rats, ## $P < 0.01$  compared with PCOS rats, ### $P < 0.001$  compared with PCOS rats.

factor p50/p65. The present study also found that SGD treatment decreased the levels of TNF- $\alpha$ , IL-1 $\beta$ , IL-6, and IL-18 in ovary tissue of PCOS rats. These findings are consistent with the previous studies that showed that NF-κB can regulate the inflammatory factor genes including TNF- $\alpha$ , IL-1 $\beta$ , IL-6, and IL-18 [53,54]. We all knew that local inflammation in PCOS ovaries could impair follicular growth and maturation. It is possible that the increased inflammatory cytokine levels affected follicular development. These findings indicated that SGD may reduce the size and number of follicular cysts in PCOS rats by reducing the T level and the inhibited NF-κB activation may contribute to the regulatory effect. As we all know that each TCM comprises more than one herb and it exerts therapeutic effect by using individual herbs in combination, i.e., SGD consists of two herbs: *Radix Paeoniae Alba* and *Glycyrrhizae uralensis*. In this prescription, paeoniflorin and glycyrrhizin act as the main components and they were reported to have the capacity of lowering the serum levels of androgen. We believe that the main reason for the efficacy of SGD on PCOS relates to the active ingredients of each herb and these ingredients exert therapeutic effects through multi-target and multi-pathway. To confirm the key active ingredients that are responsible for the therapeutic effect, further study is needed.

## Conclusion

Our study demonstrated that SGD could ameliorate hyperandrogenism in PCOS rats, and the potential mechanism may involve in the inhibited NF-κB activation. Results from this present study provide experimental evidence about the therapeutic potential of SGD in PCOS.

## Acknowledgments

The authors contributed equally to the present work. The authors thank J.-p.Z. for preparing the SGT solution for the present study.

## Author Contribution

Rui-gang Hou and Yun-yun Shao conceived and designed the study; Zhuang-peng Chang, Yao Cheng, Xin-chun Wang, Jing-ping Zhang, Xiao-juan Feng and Yi-ting Guo performed the experiments; Jun-jin Liu and Zhuang-peng Chang wrote the paper; Rui-gang Hou reviewed and edited the manuscript. All authors discussed the results and approved the final manuscript.

## Competing Interests

The authors declare that there are no competing interests associated with the manuscript.

## Funding

This research was supported by Shanxi Zhendong Pharmaceutical Co. for modernization of Chinese medicine key technology research projects [grant no. 2014ZD0102; grant no. 2016ZD0303] and Shanxi Province key R&D program [grant no. 201603D321035].

## Abbreviations

ER $\alpha$ , estrogen receptor  $\alpha$ ; EST, estrogen sulfotransferase; GC, granular cell; H&E, hematoxylin–eosin; IHC, immunohistochemical; PCOS, polycystic ovary syndrome; PPAR- $\gamma$ , peroxisome proliferator-activated receptor- $\gamma$ ; SGD, Shaoyao-Gancao Decoction; STS, steroid sulfatase; TCM, traditional Chinese medicine.

## References

- Yu, J., Zhai, D., Hao, L., Zhang, D., Bai, L., Cai, Z. et al. (2014) Cryptotanshinone reverses reproductive and metabolic disturbances in PCOS model rats via regulating the expression of CYP17 and AR. *J. Evidence-Based Complementary Altern. Med.* **2014**, 10, <https://doi.org/10.1155/2014/670743>
- Hu, W. and Qiao, J. (2011) Expression and regulation of adipocyte fatty acid binding protein in granulosa cells and its relation with clinical characteristics of polycystic ovary syndrome. *Endocrine* **40**, 196–202, <https://doi.org/10.1007/s12020-011-9495-9>
- Tannus, S., Burke, Y.Z. and Kol, S. (2015) Treatment strategies for the infertile polycystic ovary syndrome patient. *Women's Health (London)* **11**, 901–912, <https://doi.org/10.2217/whe.15.40>
- Gur, E.B., Karadeniz, M. and Turan, G.A. (2015) Fetal programming of polycystic ovary syndrome. *World J. Diabetes* **6**, 936–942, <https://doi.org/10.4239/wjd.v6.i7.936>
- Schmidt, J., Weijdegard, B., Mikkelsen, A.L., Lindenberg, S., Nilsson, L. and Brannstrom, M. (2014) Differential expression of inflammation-related genes in the ovarian stroma and granulosa cells of PCOS women. *Mol. Hum. Reprod.* **20**, 49–58, <https://doi.org/10.1093/molehr/gat051>
- Andrea, R., Alessandra, G. and Renato, P. (2011) The role of low-grade inflammation in the polycystic ovary syndrome. *Mol. Cell. Endocrinol.* **335**, 30–41, <https://doi.org/10.1016/j.mce.2010.08.002>
- Piltonen, T.T., Chen, J., Erikson, D.W., Spitzer, T.L., Barragan, F., Rabban, J.T. et al. (2013) Mesenchymal stem/progenitors and other endometrial cell types from women with polycystic ovary syndrome (PCOS) display inflammatory and oncogenic potential. *J. Clin. Endocrinol. Metab.* **98**, 3765–3775, <https://doi.org/10.1210/jc.2013-1923>
- Orostica, L., Astorga, I., Plaza-Parrochia, F., Vera, C., Garcia, V., Carvajal, R. et al. (2016) Proinflammatory environment and role of TNF-alpha in endometrial function of obese women having polycystic ovarian syndrome. *Int. J. Obes. (London)* **40**, 1715–1722, <https://doi.org/10.1038/ijo.2016.154>
- Dawood, A., Alkafrawy, N., Saleh, S., Noreldin, R. and Zewain, S. (2018) The relationship between IL-18 and atherosclerotic cardiovascular risk in Egyptian lean women with polycystic ovary syndrome. *Gynecol. Endocrinol.* **34**, 294–297, <https://doi.org/10.1080/09513590.2017.1395835>
- Boots, C.E. and Jungheim, E.S. (2015) Inflammation and human ovarian follicular dynamics. *Semin. Reprod. Med.* **33**, 270–275, <https://doi.org/10.1055/s-0035-1554928>
- Marciniak, A., Nawrocka-Rutkowska, J., Brodowska, A., Wiśniewska, B. and Starczewski, A. (2016) Cardiovascular system diseases in patients with polycystic ovary syndrome – the role of inflammation process in this pathology and possibility of early diagnosis and prevention. *Ann. Agric. Environ. Med.* **23**, 537–541, <https://doi.org/10.5604/12321966.1226842>
- Jeong, S.J., Lim, H.S., Seo, C.S., Kim, J.H., Jin, S.E., Yoo, S.R. et al. (2015) Traditional herbal formula Jakyakgamcho-tang (Paeonia lactiflora and Glycyrrhiza uralensis) impairs inflammatory chemokine production by inhibiting activation of STAT1 and NF-kappaB in HaCaT cells. *Phytomedicine* **22**, 326–332, <https://doi.org/10.1016/j.phymed.2014.12.002>
- Takahashi, K. and Kitao, M. (1994) Effect of TJ-68 (shakuyaku-kanzo-to) on polycystic ovarian disease. *Int. J. Fertil. Menopausal Stud.* **39**, 69–76
- Guan, Y.G., Liao, J.B., Li, K.Y., Li, Y.C., Song, Y., Ling, J. et al. (2014) Potential mechanisms of an antiadenomyosis Chinese herbal formula shaoyao-gancao decoction in primary cell culture model. *Evidence-Based Complementary Altern. Med.* **2014**, 11, <https://doi.org/10.1155/2014/982913>
- Takeuchi, T. (1988) Effect of shakuyaku-kanzo-to, shakuyaku, kanzo, paeoniflorin, glycyrrhetic acid and glycyrrhizin on ovarian function in rats. *Nihon Naibunpi Gakkai Zasshi* **64**, 1124–1139
- Takahashi, K., Mutiara, S., Kita, N., Tsuji, S., Noda, Y. and Miyazaki, K. (2007) Odd variation of 75 g oral glucose tolerance test results in a Japanese patient with polycystic ovary syndrome: a case report. *Arch. Gynecol. Obstet.* **275**, 405–409, <https://doi.org/10.1007/s00404-006-0275-3>
- Sui, F., Zhou, H.Y., Meng, J., Du, X.L., Sui, Y.P., Zhou, Z.K. et al. (2016) A Chinese herbal decoction, Shaoyao-Gancao Tang, exerts analgesic effect by down-regulating the TRPV1 channel in a rat model of arthritic pain. *Am. J. Chin. Med.* **44**, 1363–1378, <https://doi.org/10.1142/S0192415X16500762>
- Zhang, Y., Jia, X., Yang, J., Li, Q., Yan, G., Xu, Z. et al. (2016) Effects of Shaoyao-Gancao decoction on infarcted cerebral cortical neurons: suppression of the inflammatory response following cerebral ischemia-reperfusion in a rat model. *Biomed. Res. Int.* **2016**, 14
- Rauchensteiner, F., Matsumura, Y., Yamamoto, Y., Yamaji, S. and Tani, T. (2005) Analysis and comparison of Radix Glycyrrhizae (licorice) from Europe and China by capillary-zone electrophoresis (CZE). *J. Pharm. Biomed. Anal.* **38**, 594–600, <https://doi.org/10.1016/j.jpba.2005.01.038>

- 20 Lin, Z.J., Qiu, S.X., Wufuer, A. and Shum, L. (2005) Simultaneous determination of glycyrrhizin, a marker component in radix Glycyrrhizae, and its major metabolite glycyrrhetic acid in human plasma by LC-MS/MS. *J. Chromatogr. B: Anal. Technol. Biomed. Life Sci.* **814**, 201–207, <https://doi.org/10.1016/j.jchromb.2004.10.026>
- 21 Josephs, R.A., Guinn, J.S., Harper, M.L. and Askari, F. (2001) Liquorice consumption and salivary testosterone concentrations. *Lancet* **358**, 1613–1614, [https://doi.org/10.1016/S0140-6736\(01\)06664-8](https://doi.org/10.1016/S0140-6736(01)06664-8)
- 22 Sakamoto, K. and Wakabayashi, K. (1988) Inhibitory effect of glycyrrhetic acid on testosterone production in rat gonads. *Endocrinol. Jpn.* **35**, 333–342, <https://doi.org/10.1507/endocrj1954.35.333>
- 23 Takeuchi, T., Nishii, O., Okamura, T. and Yaginuma, T. (1991) Effect of paeoniflorin, glycyrrhizin and glycyrrhetic acid on ovarian androgen production. *Am. J. Chin. Med.* **19**, 73–78, <https://doi.org/10.1142/S0192415X91000119>
- 24 Spires, T.E., Fink, B.E., Kick, E.K., You, D., Rizzo, C.A., Takenaka, I. et al. (2005) Identification of novel functional inhibitors of 17beta-hydroxysteroid dehydrogenase type III (17beta-HSD3). *Prostate* **65**, 159–170, <https://doi.org/10.1002/pros.20279>
- 25 Chen, Z.W., Tong, L., Li, S.M., Li, D.X., Zhang, Y., Zhou, S.P. et al. (2014) Identification of metabolites of Radix Paeoniae Alba extract in rat bile, plasma and urine by ultra-performance liquid chromatography-quadrupole time-of-flight mass spectrometry. *J. Pharm. Anal.* **4**, 14–25, <https://doi.org/10.1016/j.jpha.2013.06.004>
- 26 Tang, N.Y., Liu, C.H., Hsieh, C.T. and Hsieh, C.L. (2010) The anti-inflammatory effect of paeoniflorin on cerebral infarction induced by ischemia-reperfusion injury in Sprague-Dawley rats. *Am. J. Chin. Med.* **38**, 51–64, <https://doi.org/10.1142/S0192415X10007786>
- 27 Zhang, H., Qi, Y., Yuan, Y., Cai, L., Xu, H., Zhang, L. et al. (2017) Paeoniflorin ameliorates experimental autoimmune encephalomyelitis via inhibition of dendritic cell function and Th17 cell differentiation. *Sci. Rep.* **7**, 670743
- 28 Guo, Y., Qi, Y., Yang, X., Zhao, L., Wen, S., Liu, Y. et al. (2016) Association between polycystic ovary syndrome and gut microbiota. *PLoS One* **11**, e0153196, <https://doi.org/10.1371/journal.pone.0153196>
- 29 Sun, Y., Wu, Z., Wei, L., Liu, C., Zhu, S. and Tang, S. (2015) High-visfatin levels in women with polycystic ovary syndrome: evidence from a meta-analysis. *Gynecol. Endocrinol.* **31**, 808–814, <https://doi.org/10.3109/09513590.2015.1056140>
- 30 Misso, M.L., Teede, H.J., Hart, R., Wong, J., Rombauts, L., Melder, A.M. et al. (2012) Status of clomiphene citrate and metformin for infertility in PCOS. *Trends Endocrinol. Metab.* **23**, 533–543, <https://doi.org/10.1016/j.tem.2012.07.001>
- 31 Palomba, S., Falbo, A. and Zullo, F. (2009) Management strategies for ovulation induction in women with polycystic ovary syndrome and known clomifene citrate resistance. *Curr. Opin. Obstet. Gynecol.* **21**, 465–473, <https://doi.org/10.1097/GCO.0b013e328332d188>
- 32 Baravalle, C., Salvetti, N.R., Mira, G.A., Pezzone, N. and Ortega, H.H. (2006) Microscopic characterization of follicular structures in letrozole-induced polycystic ovarian syndrome in the rat. *Arch. Med. Res.* **37**, 830–839, <https://doi.org/10.1016/j.arcmed.2006.04.006>
- 33 Tarumi, W., Itoh, M.T. and Suzuki, N. (2014) Effects of 5alpha-dihydrotestosterone and 17beta-estradiol on the mouse ovarian follicle development and oocyte maturation. *PLoS One* **9**, e99423, <https://doi.org/10.1371/journal.pone.0099423>
- 34 Chen, M.J., Chou, C.H., Chen, S.U., Yang, W.S., Yang, Y.S. and Ho, H.N. (2015) The effect of androgens on ovarian follicle maturation: Dihydrotestosterone suppress FSH-stimulated granulosa cell proliferation by upregulating PPARgamma-dependent PTEN expression. *Sci. Rep.* **5**, 18319, <https://doi.org/10.1038/srep18319>
- 35 Krishnan, A. and Muthusami, S. (2017) Hormonal alterations in PCOS and its influence on bone metabolism. *J. Endocrinol.* **232**, R99–R113, <https://doi.org/10.1530/JOE-16-0405>
- 36 Dumont, A., Robin, G., Catteau-Jonard, S. and Dewailly, D. (2015) Role of anti-mullerian hormone in pathophysiology, diagnosis and treatment of polycystic ovary syndrome: a review. *Reprod. Biol. Endocrinol.* **13**, 1–10, <https://doi.org/10.1186/s12958-015-0134-9>
- 37 Zhou, D., Zhuo, Y., Che, L., Lin, Y., Fang, Z. and Wu, D. (2014) Nutrient restriction induces failure of reproductive function and molecular changes in hypothalamus-pituitary-gonadal axis in postpubertal gilts. *Mol. Biol. Rep.* **41**, 4733–4742, <https://doi.org/10.1007/s11033-014-3344-x>
- 38 Sun, J., Jin, C., Wu, H., Zhao, J., Cui, Y., Liu, H. et al. (2013) Effects of electro-acupuncture on ovarian P450arom, P450c17alpha and mRNA expression induced by letrozole in PCOS rats. *PLoS One* **8**, e79382, <https://doi.org/10.1371/journal.pone.0079382>
- 39 Dias, N.J. and Selcer, K.W. (2016) Steroid sulfatase in the human MG-63 preosteoblastic cell line: antagonistic regulation by glucocorticoids and NFkappaB. *Mol. Cell. Endocrinol.* **420**, 85–96, <https://doi.org/10.1016/j.mce.2015.11.029>
- 40 Jiang, M., Klein, M., Zanger, U.M., Mohammad, M.K., Cave, M.C., Gaikwad, N.W. et al. (2016) Inflammatory regulation of steroid sulfatase: a novel mechanism to control estrogen homeostasis and inflammation in chronic liver disease. *J. Hepatol.* **64**, 44–52, <https://doi.org/10.1016/j.jhep.2015.07.022>
- 41 Han, L., Shen, W.J., Bittner, S., Kraemer, F.B. and Azhar, S. (2017) PPARs: regulators of metabolism and as therapeutic targets in cardiovascular disease. Part II: PPAR-beta/delta and PPAR-gamma. *Future Cardiol.* **13**, 279–296, <https://doi.org/10.2217/fca-2017-0019>
- 42 Wang, Y.C., Zhu, W.J. and Xie, B.G. (2014) Expression of PPAR-γ in adipose tissue of rats with polycystic ovary syndrome induced by DHEA. *Mol. Med. Rep.* **9**, 889–893, <https://doi.org/10.3892/mmr.2014.1895>
- 43 Jang, M., Lee, M.J., Lee, J.M., Bae, C.S., Kim, S.H., Ryu, J.H. et al. (2014) Oriental medicine Kyung-Ok-Ko prevents and alleviates dehydroepiandrosterone-induced polycystic ovarian syndrome in rats. *PLoS One* **9**, e87623, <https://doi.org/10.1371/journal.pone.0087623>
- 44 Gervasio, C.G., Bernuci, M.P., Silva-de-Sa, M.F. and Rosa-E-Silva, A.C. (2014) The role of androgen hormones in early follicular development. *ISRN Obstet. Gynecol.* **2014**, 11, <https://doi.org/10.1155/2014/818010>
- 45 Wang, F., Pan, J., Liu, Y., Meng, Q., Lv, P., Qu, F. et al. (2015) Alternative splicing of the androgen receptor in polycystic ovary syndrome. *Proc. Natl. Acad. Sci. U.S.A.* **112**, 4743–4748, <https://doi.org/10.1073/pnas.1418216112>
- 46 Paixao, L., Velez, L.M., Santos, B.R., Tusset, C., Lecke, S.B., Motta, A.B. et al. (2016) Early ovarian follicular development in prepubertal Wistar rats acutely exposed to androgens. *J. Dev. Origins Health Dis.* **7**, 384–390, <https://doi.org/10.1017/S2040174416000222>
- 47 Yuan, Q., Zhang, X., Liu, Z., Song, S., Xue, P., Wang, J. et al. (2013) Ethanol extract of *Adiantum capillus-veneris* L. suppresses the production of inflammatory mediators by inhibiting NF-kappaB activation. *J. Ethnopharmacol.* **147**, 603–611, <https://doi.org/10.1016/j.jep.2013.03.046>

- 48 Tong, L. and Tergaonkar, V. (2014) Rho protein GTPases and their interactions with NF-kappaB: crossroads of inflammation and matrix biology. *Biosci. Rep.* **34**, 283–295, <https://doi.org/10.1042/BSR20140021>
- 49 Puar, Y.R., Shanmugam, M.K., Fan, L., Arfuso, F., Sethi, G. and Tergaonkar, V. (2018) Evidence for the involvement of the master transcription factor NF-kappaB in cancer initiation and progression. *Biomedicines* **6**, E82, <https://doi.org/10.3390/biomedicines6030082>
- 50 Shin, E.M., Hay, H.S., Lee, M.H., Goh, J.N., Tan, T.Z., Sen, Y.P. et al. (2014) DEAD-box helicase DP103 defines metastatic potential of human breast cancers. *J. Clin. Invest.* **124**, 3807–3824, <https://doi.org/10.1172/JCI73451>
- 51 Jiang, W.-L., Chen, X.-G., Zhu, H.-B., Gao, Y.-B., Tian, J.-W. and Fu, F.-H. (2009) Paeoniflorin inhibits systemic inflammation and improves survival in experimental sepsis. *Basic Clin. Pharmacol. Toxicol.* **105**, 64–71, <https://doi.org/10.1111/j.1742-7843.2009.00415.x>
- 52 Hong, C., Schuffler, A., Kauh, U., Cao, J., Wu, C.F., Opatz, T. et al. (2017) Identification of NF-kappaB as determinant of posttraumatic stress disorder and its inhibition by the Chinese herbal remedy free and easy wanderer. *Front. Pharmacol.* **8**, 1–17, <https://doi.org/10.3389/fphar.2017.00181>
- 53 Kim, E.A., Kim, S.Y., Ye, B.R., Kim, J., Ko, S.C., Lee, W.W. et al. (2018) Anti-inflammatory effect of Apo-9'-fucoxanthinone via inhibition of MAPKs and NF-kB signaling pathway in LPS-stimulated RAW 264.7 macrophages and zebrafish model. *Int. Immunopharmacol.* **59**, 339–346, <https://doi.org/10.1016/j.intimp.2018.03.034>
- 54 Zhang, Y., Hu, M., Meng, F., Sun, X., Xu, H., Zhang, J. et al. (2017) Metformin ameliorates uterine defects in a rat model of polycystic ovary syndrome. *EBioMedicine* **18**, 157–170, <https://doi.org/10.1016/j.ebiom.2017.03.023>
